# Supplementary material
Source: PubMed Central journal article supplement (PMC7877191)

## Supplementary tables

### Supplementary Table 1. List of self-reported symptoms and corresponding question used in the reporting app

| Symptoms        | Question                                                                             |
|-----------------|--------------------------------------------------------------------------------------|
| Fatigue         | Are you experiencing unusual fatigue?                                                |
| Anosmia/ageusia | Do you have a loss of smell/taste?                                                   |
| Cough           | Do you have a persistent cough                                                       |
| Dyspnoea        | Are you experiencing unusual shortness of breath?                                    |
| Diarrhoea       | Are you experiencing diarrhoea?                                                      |
| Delirium        | Do you have any of the following symptoms: confusion, disorientation, or drowsiness? |
| Skipped meals   | Have you been skipping meals?                                                        |
| Abdominal pain  | Do you have an unusual abdominal pain?                                               |
| Chest pain      | Are you feeling an unusual chest pain or tightness in your chest?                    |
| Hoarse voice    | Do you have an unusually hoarse voice?                                               |
| Headache        | Do you have a headache?                                                              |
| Sore throat     | Do you have a sore throat?                                                           |
| Myalgia         | Do you have unusual strong muscle pains?                                             |

### Supplementary Table 2. NSGAI parameters

| Parameter                   | Value                |
|-----------------------------|----------------------|
| Population size             | 80                   |
| Number of offspring         | 40                   |
| Total number of generations | 500                  |
| Parent selection            | Tournament Selection |
| Crossover                   | Two-point crossover  |
| Crossover probability       | 0.9                  |
| Mutation                    | Random flip          |
| Mutation probability        | 0.1                  |

**Supplementary Table 3. Sensitivity, specificity, and TPC for the four clinically inferred symptom combinations computed on the UK-discovery cohort**

| Symptom                                 | Age group | 3-day analysis  |      |                 |      |     |    | 7-day analysis  |       |                 |      |     |    |
|-----------------------------------------|-----------|-----------------|------|-----------------|------|-----|----|-----------------|-------|-----------------|------|-----|----|
|                                         |           | Sensitivity (%) |      | Specificity (%) |      | TPC |    | Sensitivity (%) |       | Specificity (%) |      | TPC |    |
|                                         |           | UK              | US   | UK              | US   | UK  | US | UK              | US    | UK              | US   | UK  | US |
| Respiratory symptoms <sup>1</sup>       | All       | 44.7            | 48.1 | 81.9            | 76.6 | 43  | 21 | 57.7            | 64.6  | 79.1            | 72.3 | 38  | 19 |
|                                         | [18-54]   | 45.2            | 45.2 | 81.6            | 76.8 | 38  | 20 | 58.2            | 64.3  | 78.4            | 71.6 | 33  | 18 |
|                                         | [55+]     | 42.9            | 51.4 | 82.7            | 76.5 | 64  | 22 | 55.8            | 64.9  | 80.5            | 73.0 | 54  | 20 |
| WHO-defined pneumonia <sup>2</sup>      | All       | 58.8            | 74.7 | 71.9            | 59.5 | 51  | 23 | 70.3            | 84.8  | 68.5            | 54.5 | 46  | 23 |
|                                         | [18-54]   | 59.2            | 69.0 | 71.1            | 61.3 | 45  | 22 | 70.5            | 83.3  | 67.5            | 55.5 | 41  | 21 |
|                                         | [55+]     | 57.5            | 81.1 | 73.3            | 57.8 | 73  | 24 | 69.6            | 86.5  | 70.7            | 53.6 | 65  | 25 |
| COVID-19-specific symptoms <sup>3</sup> | All       | 67.4            | 79.7 | 69.8            | 57.6 | 48  | 23 | 81.0            | 92.4  | 66.4            | 52.6 | 43  | 22 |
|                                         | [18-54]   | 68.1            | 73.8 | 69.0            | 59.5 | 42  | 22 | 82.0            | 92.9  | 65.3            | 53.8 | 38  | 20 |
|                                         | [55+]     | 65.1            | 86.5 | 71.5            | 55.7 | 69  | 24 | 77.7            | 91.9  | 68.8            | 51.4 | 62  | 25 |
| Extended Symptoms <sup>4</sup>          | All       | 90.7            | 96.2 | 26.0            | 21.1 | 86  | 35 | 95.5            | 98.7  | 23.0            | 17.9 | 82  | 35 |
|                                         | [18-54]   | 91.2            | 95.2 | 25.0            | 22.2 | 75  | 32 | 95.5            | 100.0 | 21.7            | 18.6 | 72  | 32 |
|                                         | [55+]     | 88.9            | 97.3 | 28.1            | 20.1 | 128 | 38 | 95.4            | 97.3  | 25.7            | 17.3 | 119 | 39 |

<sup>1</sup>Cough, dyspnoea; <sup>2</sup>Cough, dyspnoea, fever; <sup>3</sup>Fever, cough, dyspnoea, and anosmia/ageusia; <sup>4</sup>Fever, cough, dyspnoea, anosmia/ageusia, fatigue, and headache  
TPC = Tests per case

**Supplementary Table 4. Pareto of optimal combination of symptoms for three-day analysis computed on the UK-discovery training data, ordered by decreasing sensitivity**

| Symptom combinations                                                           | Sensitivity | Specificity | TPC |
|--------------------------------------------------------------------------------|-------------|-------------|-----|
| fatigue, anosmia/ageusia, cough, diarrhoea, headache, sore throat              | 93.8        | 11.8        | 88  |
| fatigue, fever, anosmia/ageusia, cough, headache, sore throat                  | 92.5        | 14.9        | 85  |
| fatigue, anosmia/ageusia, cough, dyspnoea, headache, sore throat               | 92.2        | 15.3        | 85  |
| fatigue, anosmia/ageusia, cough, hoarse voice, headache, sore throat           | 92.0        | 15.5        | 85  |
| fever, anosmia/ageusia, cough, diarrhoea, headache, sore throat                | 91.7        | 17.8        | 82  |
| anosmia/ageusia, cough, diarrhoea, hoarse voice, headache, sore throat         | 91.2        | 18.9        | 81  |
| fatigue, fever, anosmia/ageusia, cough, diarrhoea, headache                    | 90.6        | 22.4        | 78  |
| fatigue, anosmia/ageusia, cough, dyspnoea, diarrhoea, headache                 | 90.5        | 22.7        | 77  |
| fatigue, anosmia/ageusia, cough, chest pain, sore throat, unusual muscle pains | 89.9        | 24.0        | 76  |
| fatigue, anosmia/ageusia, cough, dyspnoea, sore throat, unusual muscle pains   | 89.8        | 24.7        | 75  |
| fatigue, fever, anosmia/ageusia, cough, dyspnoea, headache                     | 89.4        | 26.1        | 74  |
| fatigue, fever, anosmia/ageusia, cough, delirium, headache                     | 88.6        | 26.9        | 73  |
| fatigue, fever, anosmia/ageusia, cough, headache                               | 88.4        | 27.3        | 73  |
| fatigue, anosmia/ageusia, cough, dyspnoea, headache                            | 87.7        | 27.7        | 72  |
| fever, anosmia/ageusia, cough, dyspnoea, diarrhoea, headache                   | 87.3        | 31.3        | 69  |

|                                                                                  |      |      |    |
|----------------------------------------------------------------------------------|------|------|----|
| anosmia/ageusia, cough, dyspnoea, diarrhoea, hoarse voice, headache              | 87.0 | 31.7 | 68 |
| fever, anosmia/ageusia, cough, diarrhoea, delirium, headache                     | 86.7 | 31.9 | 68 |
| anosmia/ageusia, cough, diarrhoea, delirium, hoarse voice, headache              | 86.1 | 32.2 | 68 |
| anosmia/ageusia, cough, dyspnoea, hoarse voice, headache, unusual muscle pains   | 86.0 | 35.2 | 65 |
| fever, anosmia/ageusia, cough, dyspnoea, hoarse voice, headache                  | 85.8 | 35.8 | 64 |
| fever, anosmia/ageusia, cough, delirium, hoarse voice, headache                  | 85.1 | 36.1 | 64 |
| fever, anosmia/ageusia, cough, dyspnoea, delirium, headache                      | 84.9 | 36.4 | 64 |
| anosmia/ageusia, cough, dyspnoea, delirium, hoarse voice, headache               | 84.6 | 37.2 | 63 |
| anosmia/ageusia, cough, hoarse voice, headache, unusual muscle pains             | 84.2 | 37.4 | 63 |
| fever, anosmia/ageusia, cough, dyspnoea, headache                                | 84.1 | 38.3 | 62 |
| anosmia/ageusia, cough, dyspnoea, hoarse voice, headache                         | 83.7 | 39.2 | 61 |
| fatigue, fever, anosmia/ageusia, cough, dyspnoea, unusual muscle pains           | 83.5 | 40.0 | 60 |
| fatigue, anosmia/ageusia, cough, dyspnoea, hoarse voice, unusual muscle pains    | 83.2 | 40.3 | 60 |
| fatigue, anosmia/ageusia, cough, dyspnoea, chest pain, unusual muscle pains      | 82.5 | 40.7 | 59 |
| fatigue, fever, anosmia/ageusia, cough, dyspnoea, delirium                       | 82.1 | 41.6 | 58 |
| fatigue, fever, anosmia/ageusia, cough, dyspnoea                                 | 82.0 | 42.3 | 58 |
| fatigue, anosmia/ageusia, cough, dyspnoea, unusual muscle pains                  | 81.5 | 42.8 | 57 |
| fatigue, fever, anosmia/ageusia, cough, delirium                                 | 80.6 | 43.4 | 57 |
| fatigue, fever, anosmia/ageusia, cough                                           | 80.2 | 44.1 | 56 |
| fatigue, anosmia/ageusia, cough, unusual muscle pains                            | 79.4 | 44.7 | 55 |
| fatigue, fever, anosmia/ageusia, delirium, unusual muscle pains                  | 78.5 | 45.2 | 55 |
| fatigue, fever, anosmia/ageusia, unusual muscle pains                            | 78.2 | 45.9 | 54 |
| fatigue, fever, anosmia/ageusia, dyspnoea                                        | 77.6 | 46.0 | 54 |
| fatigue, anosmia/ageusia, dyspnoea, unusual muscle pains                         | 76.9 | 46.7 | 53 |
| fatigue, fever, anosmia/ageusia, delirium                                        | 76.1 | 47.7 | 52 |
| fatigue, fever, anosmia/ageusia                                                  | 75.6 | 48.5 | 52 |
| fever, anosmia/ageusia, cough, diarrhoea, chest pain, unusual muscle pains       | 75.4 | 51.4 | 49 |
| fever, anosmia/ageusia, cough, dyspnoea, diarrhoea, unusual muscle pains         | 75.0 | 52.4 | 48 |
| fever, anosmia/ageusia, cough, diarrhoea, delirium, unusual muscle pains         | 74.2 | 53.1 | 47 |
| anosmia/ageusia, cough, dyspnoea, diarrhoea, hoarse voice, unusual muscle pains  | 74.0 | 53.7 | 46 |
| fever, anosmia/ageusia, cough, dyspnoea, abdominal pain, unusual muscle pains    | 73.8 | 53.8 | 46 |
| fever, anosmia/ageusia, cough, dyspnoea, diarrhoea, hoarse voice                 | 73.7 | 54.2 | 46 |
| fever, anosmia/ageusia, cough, dyspnoea, hoarse voice, unusual muscle pains      | 73.5 | 58.5 | 42 |
| fever, anosmia/ageusia, cough, dyspnoea, chest pain, unusual muscle pains        | 72.8 | 59.1 | 41 |
| fever, anosmia/ageusia, cough, dyspnoea, skipped meals, hoarse voice             | 72.6 | 60.1 | 40 |
| anosmia/ageusia, cough, dyspnoea, chest pain, hoarse voice, unusual muscle pains | 72.1 | 61.3 | 39 |
| fever, anosmia/ageusia, cough, dyspnoea, unusual muscle pains                    | 71.1 | 62.6 | 37 |
| anosmia/ageusia, cough, dyspnoea, hoarse voice, unusual muscle pains             | 70.2 | 64.8 | 35 |
| fever, anosmia/ageusia, cough, dyspnoea, hoarse voice                            | 69.2 | 65.4 | 35 |
| anosmia/ageusia, cough, dyspnoea, chest pain, unusual muscle pains               | 68.1 | 65.6 | 34 |
| fever, anosmia/ageusia, cough, dyspnoea, chest pain                              | 67.9 | 65.9 | 34 |
| fever, anosmia/ageusia, cough, dyspnoea, delirium                                | 67.8 | 65.9 | 34 |
| fever, anosmia/ageusia, cough, unusual muscle pains                              | 67.6 | 66.9 | 33 |

|                                              |      |      |    |
|----------------------------------------------|------|------|----|
| fever, anosmia/ageusia, cough, skipped meals | 66.4 | 69.0 | 31 |
| fever, anosmia/ageusia, cough, dyspnoea      | 65.9 | 70.1 | 30 |
| fever, anosmia/ageusia, cough, delirium      | 64.3 | 70.5 | 30 |
| fever, anosmia/ageusia, cough                | 61.5 | 75.3 | 25 |
| fever, anosmia/ageusia, dyspnoea             | 55.8 | 76.4 | 24 |
| fever, anosmia/ageusia, skipped meals        | 55.3 | 76.6 | 23 |
| anosmia/ageusia, cough, hoarse voice         | 53.9 | 79.3 | 21 |
| anosmia/ageusia, cough, dyspnoea             | 53.2 | 79.5 | 21 |
| anosmia/ageusia, cough, delirium             | 49.0 | 79.7 | 20 |
| fever, anosmia/ageusia                       | 47.5 | 83.7 | 16 |
| anosmia/ageusia, cough                       | 45.6 | 85.9 | 14 |
| anosmia/ageusia, hoarse voice                | 35.5 | 87.1 | 13 |
| anosmia/ageusia, delirium                    | 24.6 | 89.2 | 11 |

---

TPC = Tests per case

## Supplementary Table 5. Pareto of optimal combination of symptoms for seven-day analysis computed on the UK-discovery training data, ordered by decreasing sensitivity

| Symptom combinations                                                                 | Sensitivity | Specificity | TPC |
|--------------------------------------------------------------------------------------|-------------|-------------|-----|
| fatigue, anosmia/ageusia, cough, diarrhoea, headache, sore throat                    | 97.5        | 93.8        | 90  |
| fatigue, fever, anosmia/ageusia, cough, headache, sore throat,                       | 96.7        | 91.6        | 87  |
| fatigue, fever, anosmia/ageusia, cough, diarrhoea, sore throat,                      | 96.0        | 87.3        | 82  |
| fatigue, fever, anosmia/ageusia, cough, sore throat, unusual muscle pains            | 95.5        | 84.0        | 79  |
| fatigue, anosmia/ageusia, cough, dyspnoea, sore throat, unusual muscle pains         | 95.0        | 83.7        | 78  |
| fatigue, anosmia/ageusia, cough, hoarse voice, sore throat, unusual muscle pains     | 94.8        | 83.5        | 78  |
| fatigue, anosmia/ageusia, cough, delirium, sore throat, unusual muscle pains         | 94.7        | 83.4        | 77  |
| fatigue, anosmia/ageusia, cough, sore throat, unusual muscle pains                   | 94.5        | 83.0        | 77  |
| fatigue, fever, anosmia/ageusia, cough, headache                                     | 93.8        | 82.5        | 76  |
| anosmia/ageusia, cough, dyspnoea, diarrhoea, sore throat, unusual muscle pains       | 92.8        | 77.8        | 71  |
| fatigue, fever, anosmia/ageusia, cough, dyspnoea, diarrhoea                          | 92.3        | 75.3        | 68  |
| fatigue, fever, anosmia/ageusia, cough, abdominal pain, unusual muscle pains         | 92.2        | 74.3        | 67  |
| fatigue, fever, anosmia/ageusia, cough, dyspnoea, unusual muscle pains               | 91.7        | 71.1        | 64  |
| fatigue, fever, anosmia/ageusia, cough, unusual muscle pains                         | 91.0        | 69.8        | 62  |
| fatigue, fever, anosmia/ageusia, cough, dyspnoea                                     | 90.5        | 69.5        | 62  |
| fatigue, anosmia/ageusia, cough, dyspnoea, unusual muscle pains                      | 90.2        | 69.3        | 61  |
| fatigue, fever, anosmia/ageusia, persistent cough                                    | 89.7        | 68.2        | 60  |
| fatigue, anosmia/ageusia, cough, unusual muscle pains                                | 89.2        | 68.1        | 59  |
| fatigue, fever, anosmia/ageusia, unusual muscle pains                                | 88.4        | 67.2        | 58  |
| fatigue, fever, anosmia/ageusia, skipped meals                                       | 88.2        | 67.1        | 58  |
| fatigue, anosmia/ageusia, persistent cough                                           | 87.0        | 66.5        | 57  |
| fatigue, fever, anosmia/ageusia                                                      | 86.9        | 65.4        | 55  |
| fever, anosmia/ageusia, cough, dyspnoea, diarrhoea, unusual muscle pains             | 86.0        | 61.5        | 52  |
| anosmia/ageusia, cough, dyspnoea, diarrhoea, hoarse voice, unusual muscle pains      | 85.9        | 60.1        | 50  |
| anosmia/ageusia, cough, dyspnoea, diarrhoea, skipped meals, unusual muscle pains     | 85.4        | 59.8        | 50  |
| anosmia/ageusia, cough, dyspnoea, abdominal pain, hoarse voice, unusual muscle pains | 85.2        | 59.0        | 49  |
| fever, anosmia/ageusia, cough, dyspnoea, hoarse voice, unusual muscle pains          | 85.0        | 54.8        | 45  |
| anosmia/ageusia, cough, dyspnoea, skipped meals, hoarse voice, unusual muscle pains  | 84.5        | 54.1        | 45  |
| anosmia/ageusia, cough, dyspnoea, chest pain, hoarse voice, unusual muscle pains     | 84.4        | 51.8        | 43  |
| anosmia/ageusia, cough, dyspnoea, hoarse voice, unusual muscle pains                 | 82.7        | 48.6        | 39  |
| anosmia/ageusia, cough, dyspnoea, chest pain, unusual muscle pains                   | 81.2        | 48.3        | 38  |
| fever, anosmia/ageusia, cough, unusual muscle pains                                  | 79.7        | 47.5        | 37  |
| anosmia/ageusia, cough, dyspnoea, chest pain, hoarse voice                           | 79.5        | 44.1        | 34  |
| fever, anosmia/ageusia, cough, dyspnoea                                              | 78.4        | 44.0        | 33  |
| anosmia/ageusia, cough, dyspnoea, hoarse voice                                       | 76.5        | 40.0        | 30  |
| anosmia/ageusia, cough, unusual muscle pains                                         | 75.4        | 39.4        | 29  |
| anosmia/ageusia, cough, dyspnoea, chest pain                                         | 75.2        | 39.4        | 29  |
| fever, anosmia/ageusia, persistent cough                                             | 73.9        | 39.0        | 28  |
| anosmia/ageusia, dyspnoea, unusual muscle pains                                      | 72.4        | 38.6        | 27  |

|                                       |      |      |    |
|---------------------------------------|------|------|----|
| fever, anosmia/ageusia, dyspnoea      | 72.2 | 38.1 | 27 |
| anosmia/ageusia, cough, dyspnoea      | 71.9 | 34.1 | 24 |
| anosmia/ageusia, dyspnoea, chest pain | 66.6 | 34.0 | 22 |
| anosmia/ageusia, unusual muscle pains | 65.4 | 30.4 | 19 |
| fever, anosmia/ageusia                | 64.6 | 29.9 | 18 |
| anosmia/ageusia, persistent cough     | 64.1 | 26.8 | 16 |
| anosmia/ageusia, dyspnoea             | 60.1 | 26.6 | 15 |
| anosmia/ageusia, delirium             | 50.4 | 25.8 | 12 |

TPC = Tests per case

## Supplementary Figures

### Supplementary Figure 1. Flow diagram of user selection for the UK-discovery cohort

CSS App users active from 24th of March to 15th of September 2020

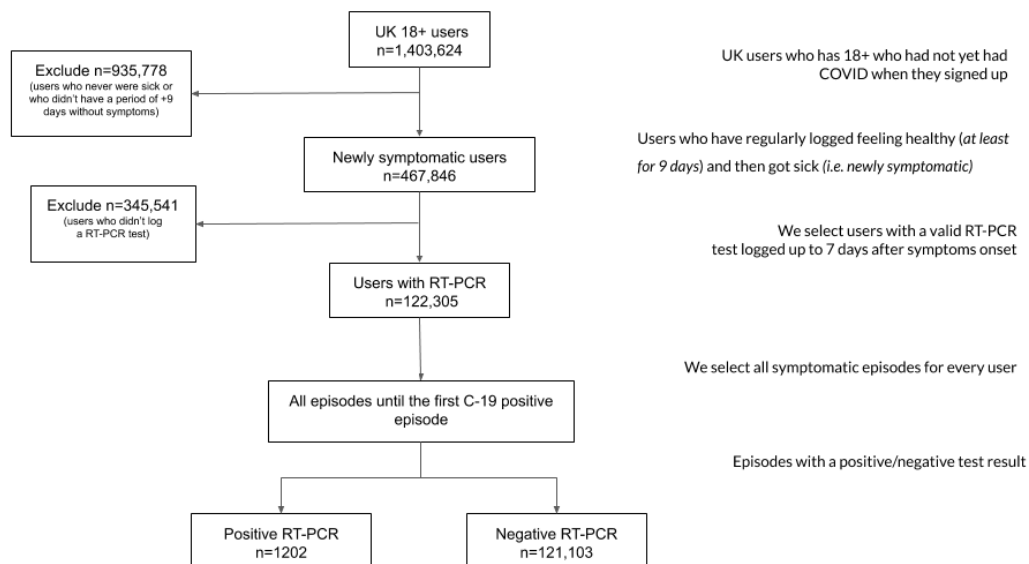

## Supplementary Figure 2. Flow diagram of user selection for the US-replication cohort

CSS App users active from 24th of March to 15th of September 2020

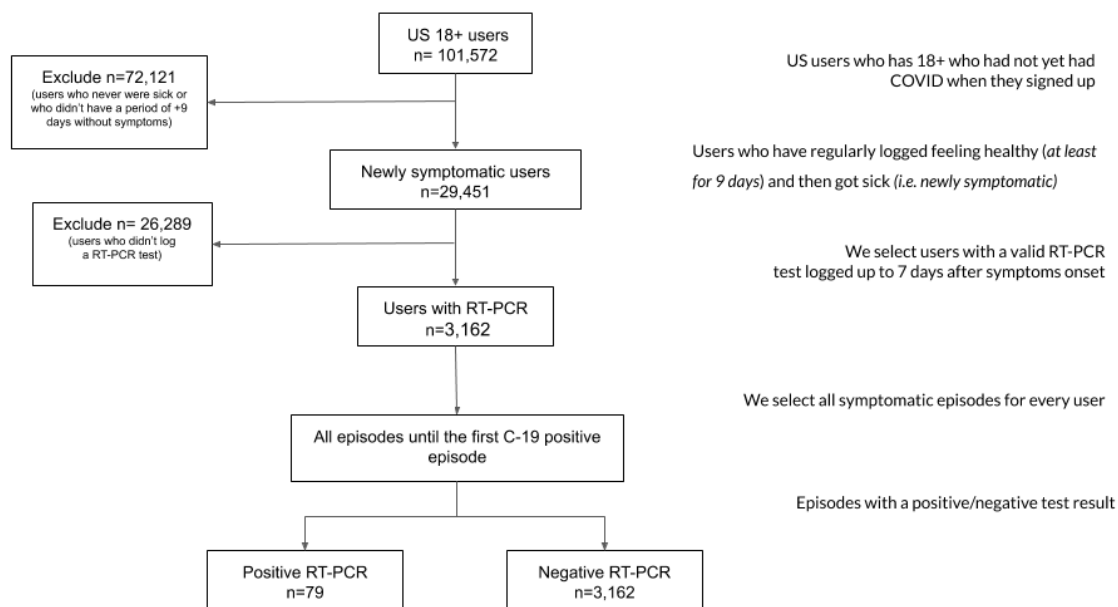

Supplement: NIHPP2020.11.23.20237313-supplement-1.pdf [file NIHPP2020.11.23.20237313-supplement-1.pdf]
